# Supplementary figures and images for: Mapping circuit dynamics during function and dysfunction
Source: eLife journal article supplement (doi:10.7554/elife.76579), 2022-03-18

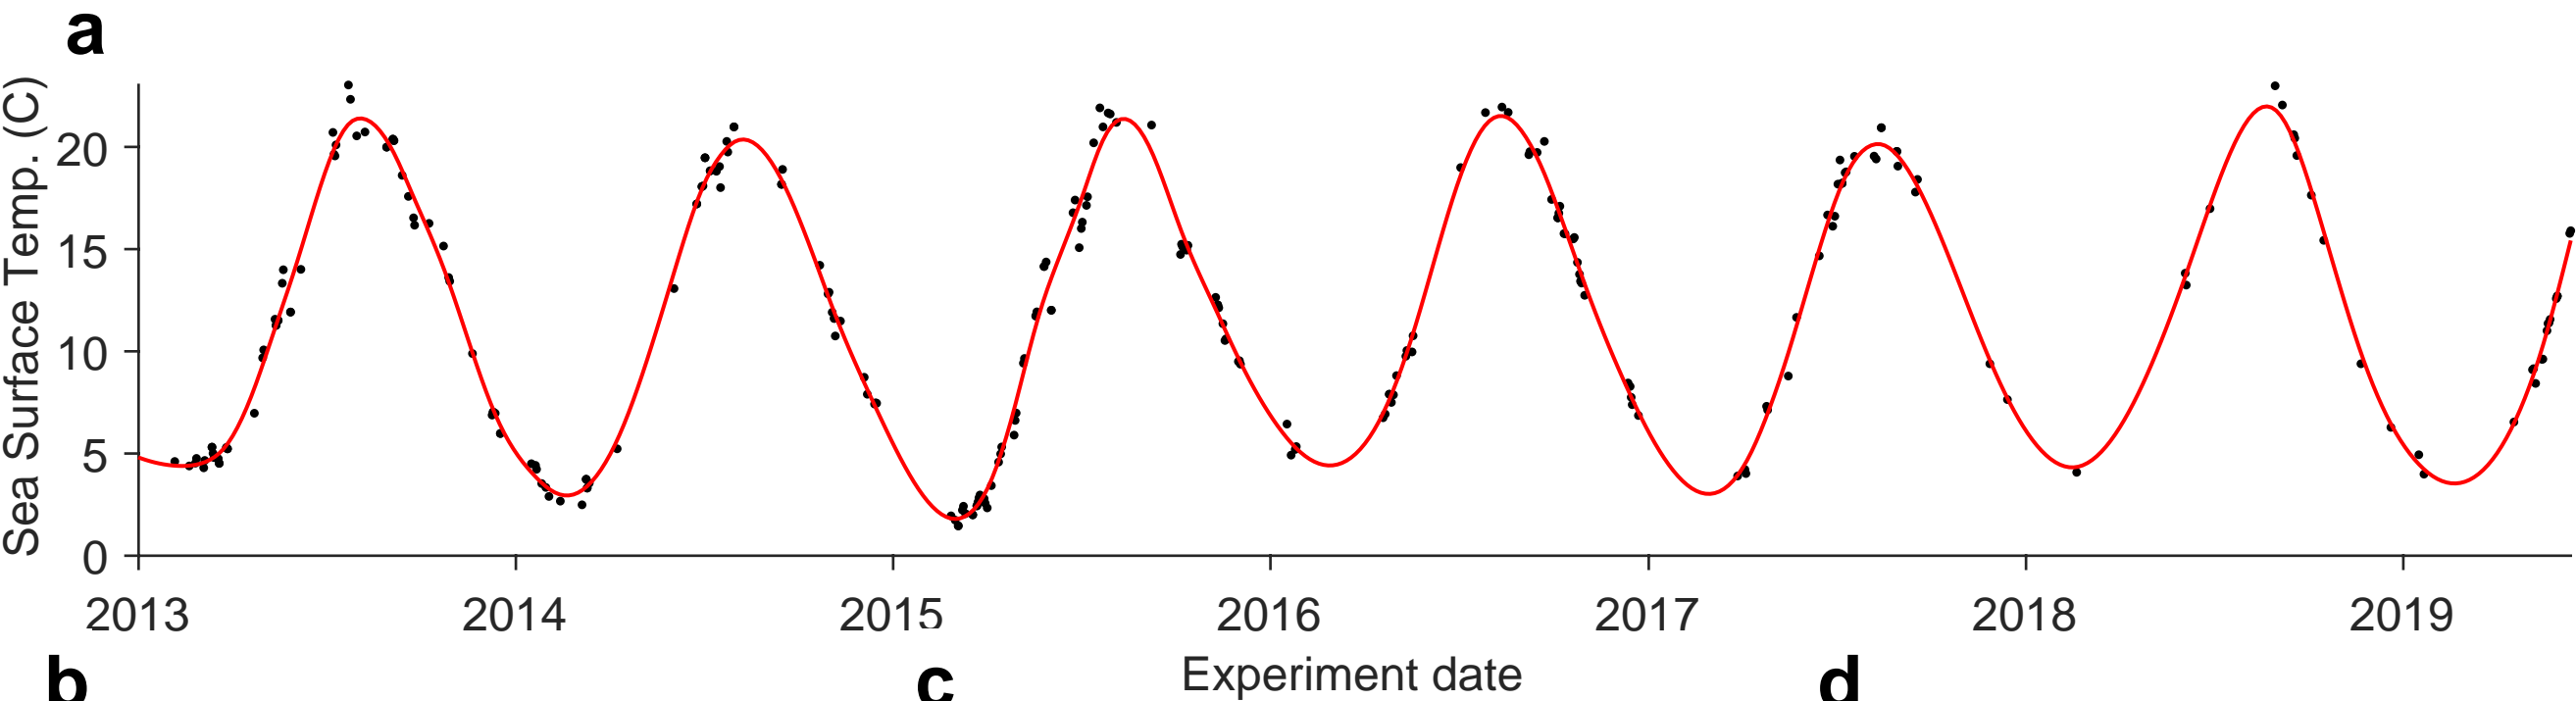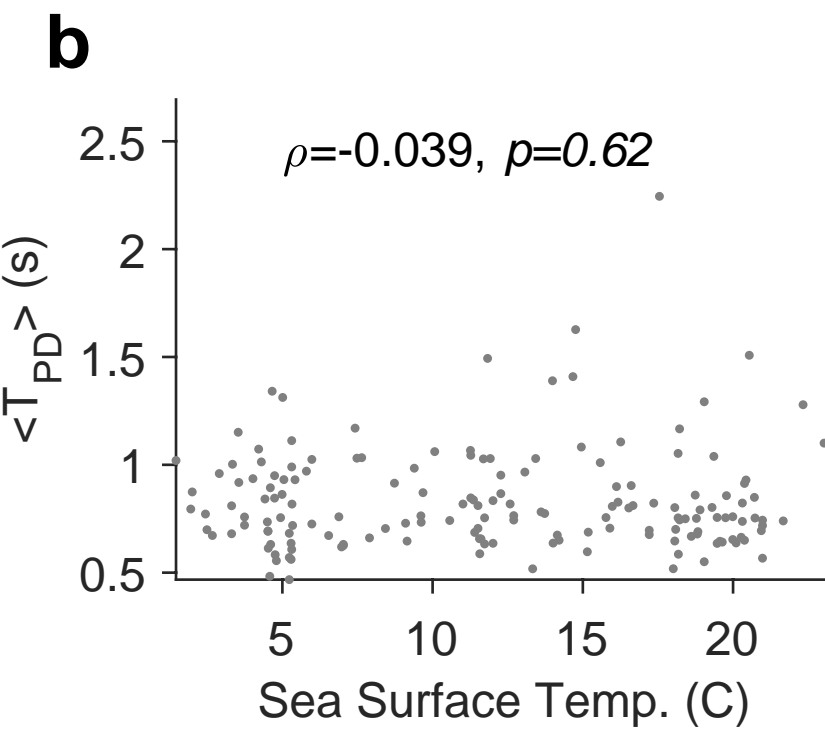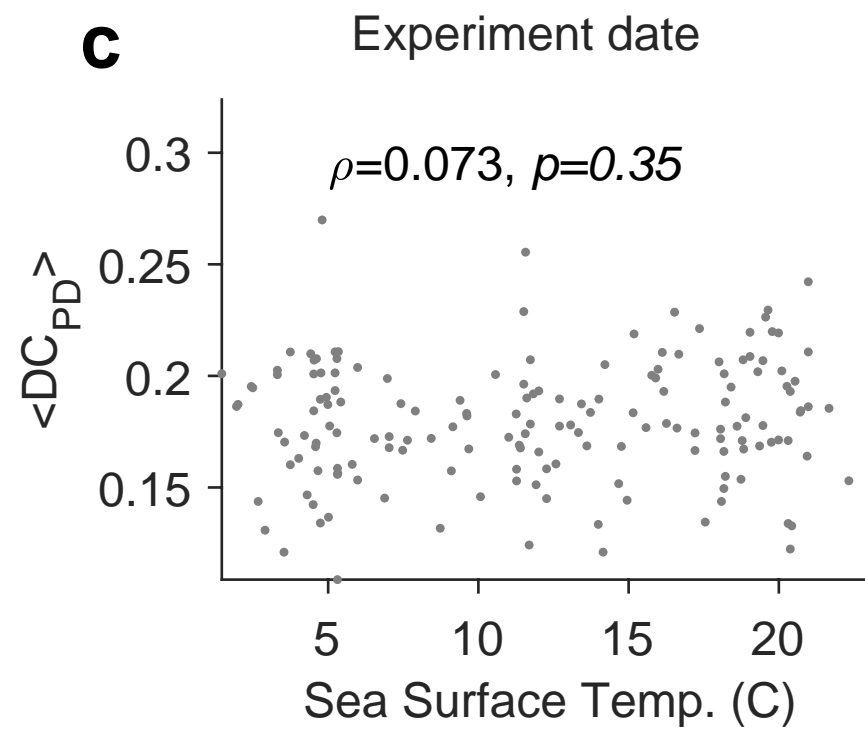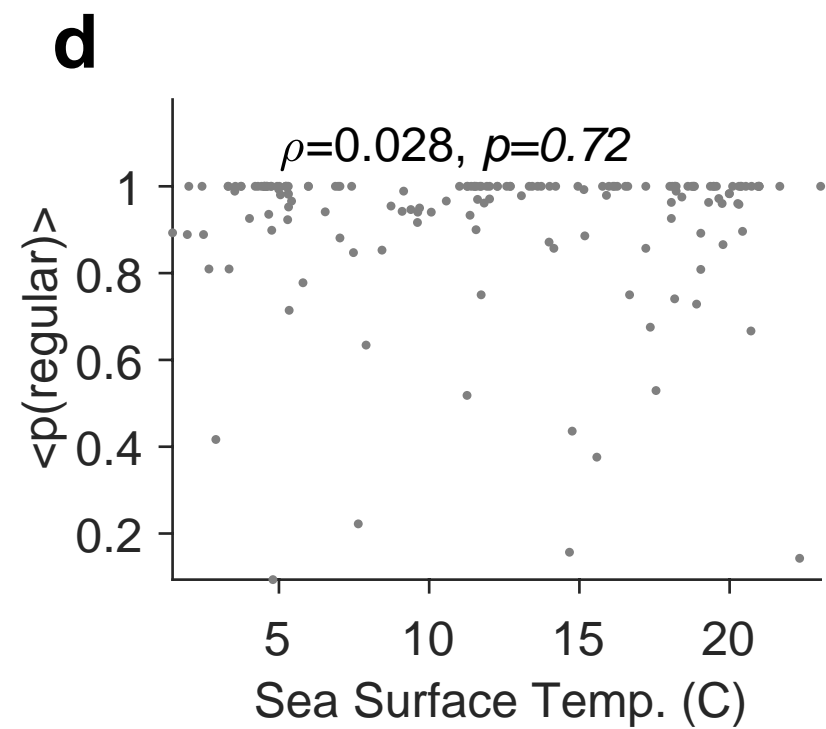

Supplement: supp [file elife-76579-supp-v1.zip]

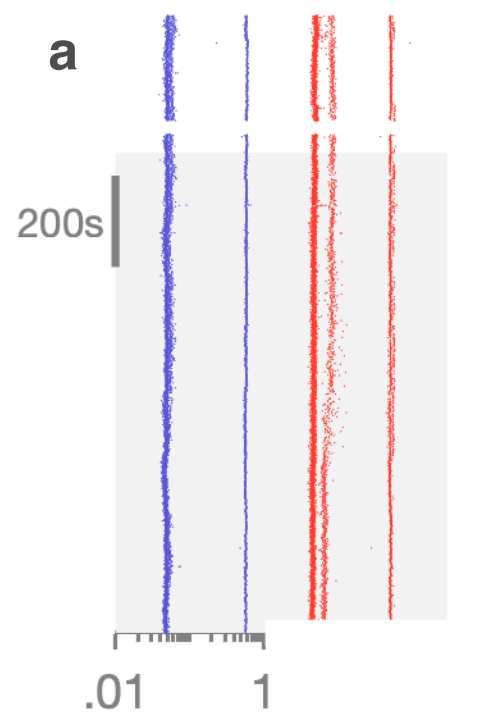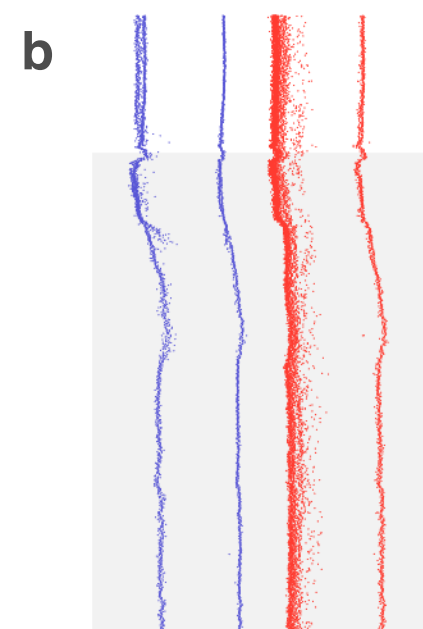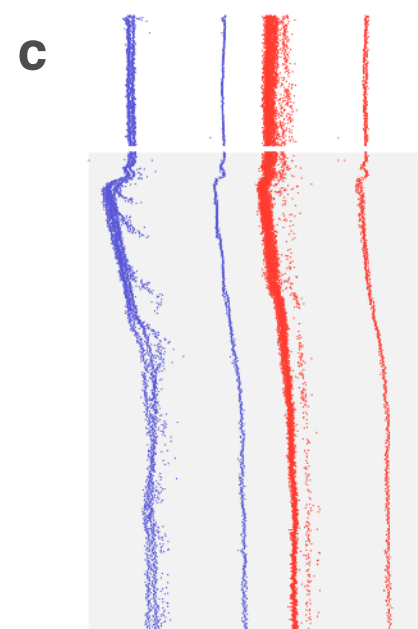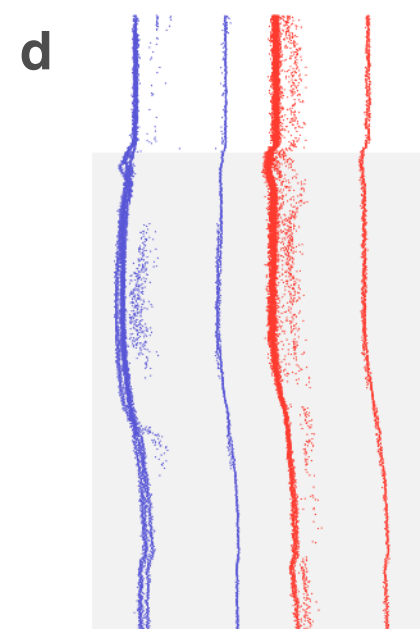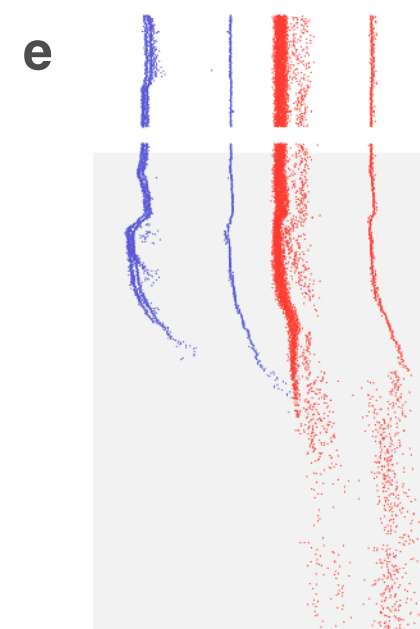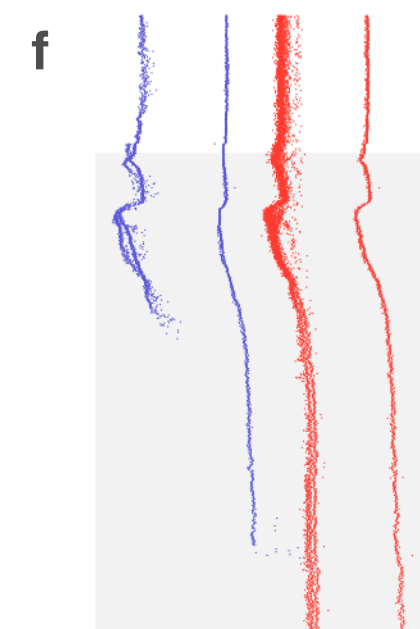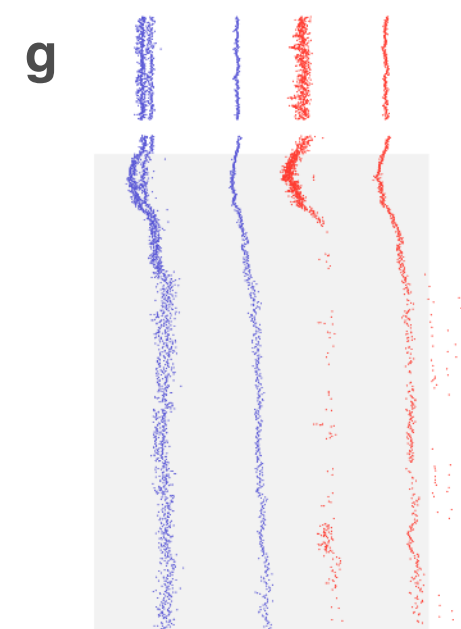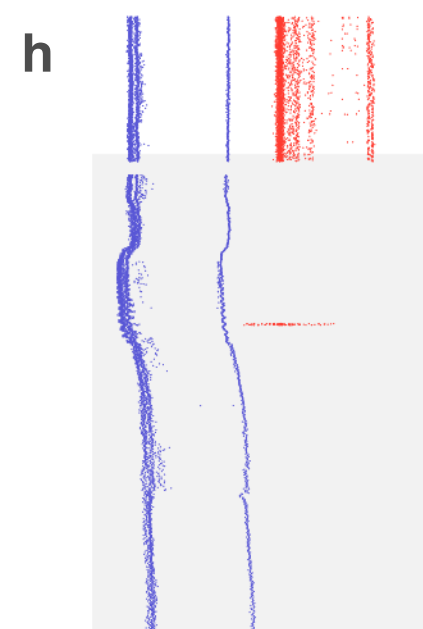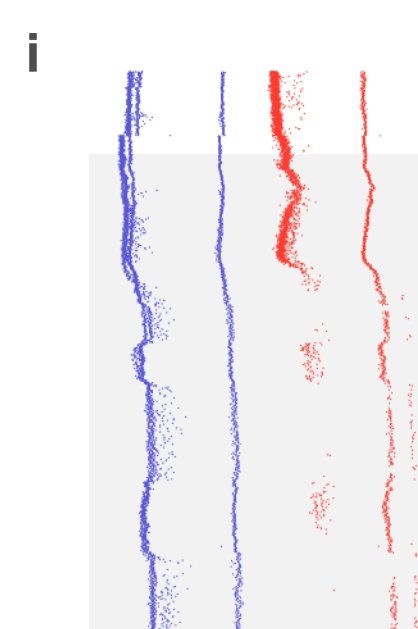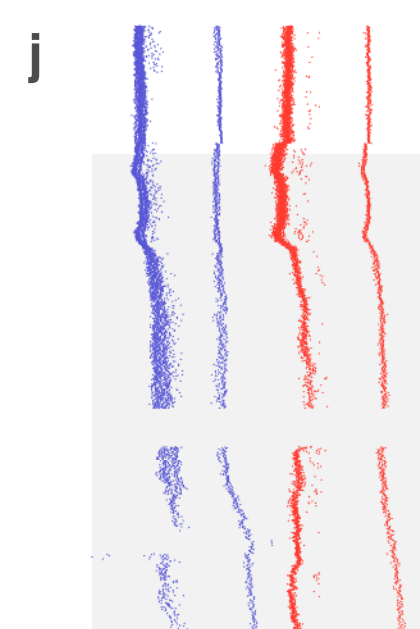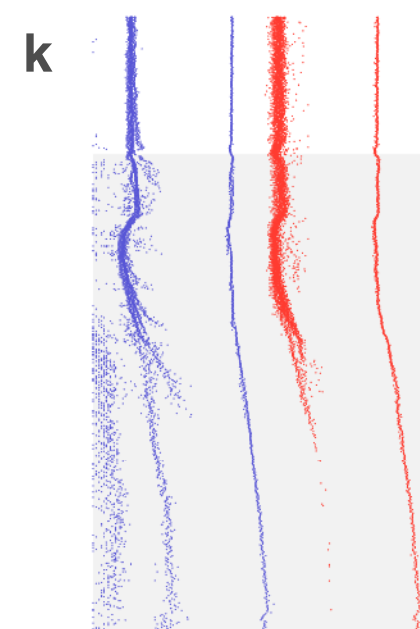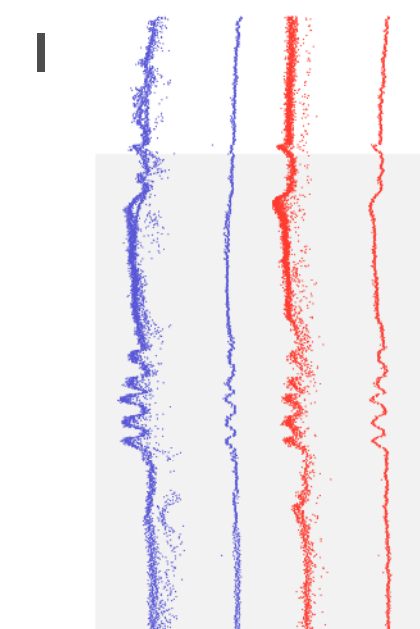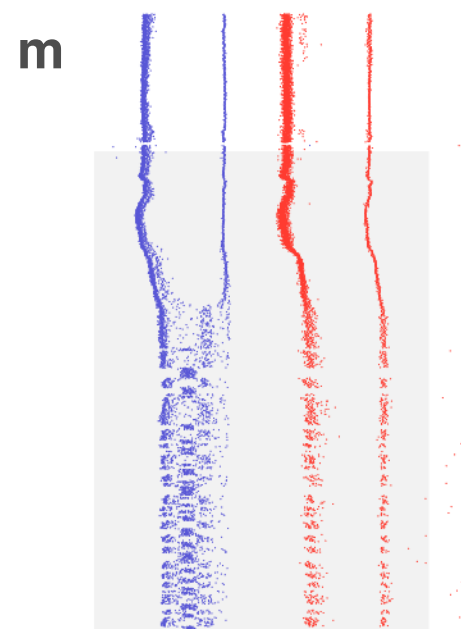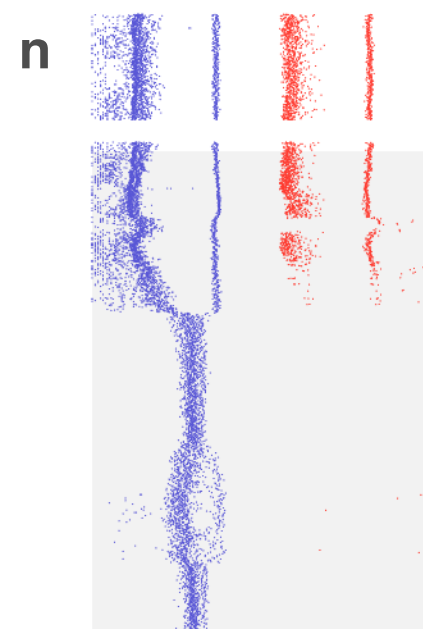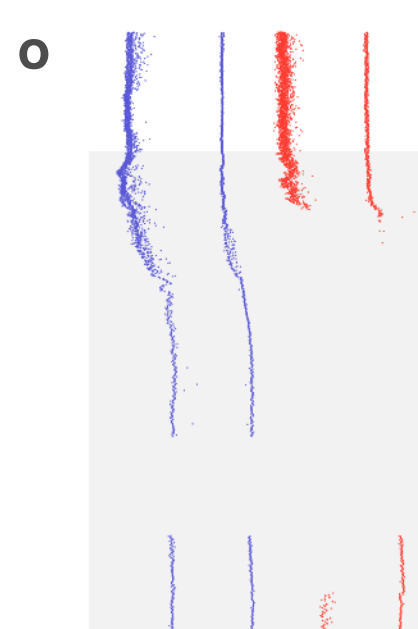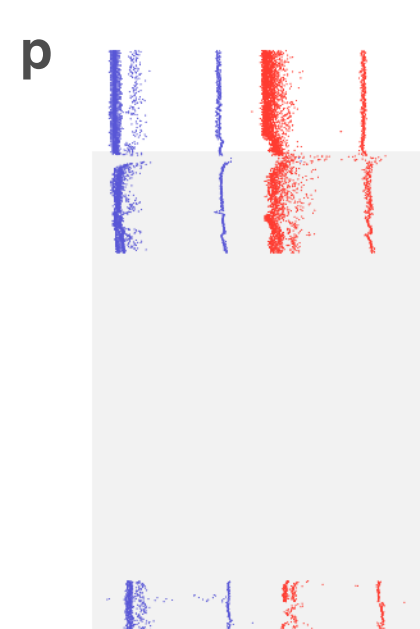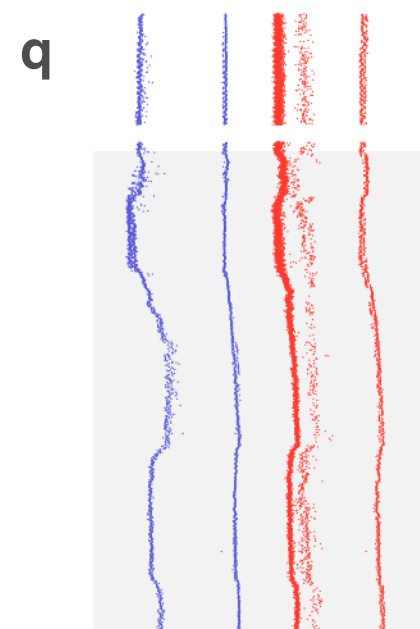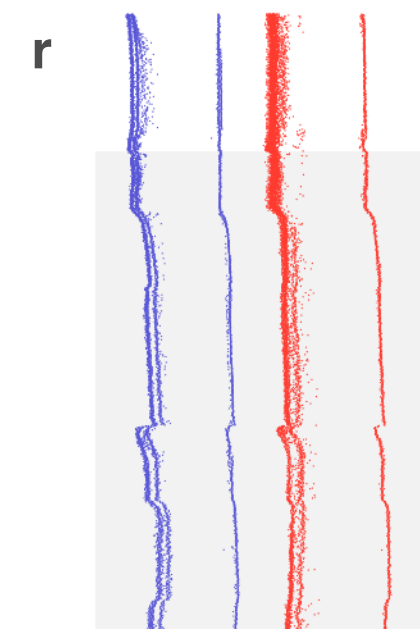

Supplement: supp [file elife-76579-supp-v1.zip]

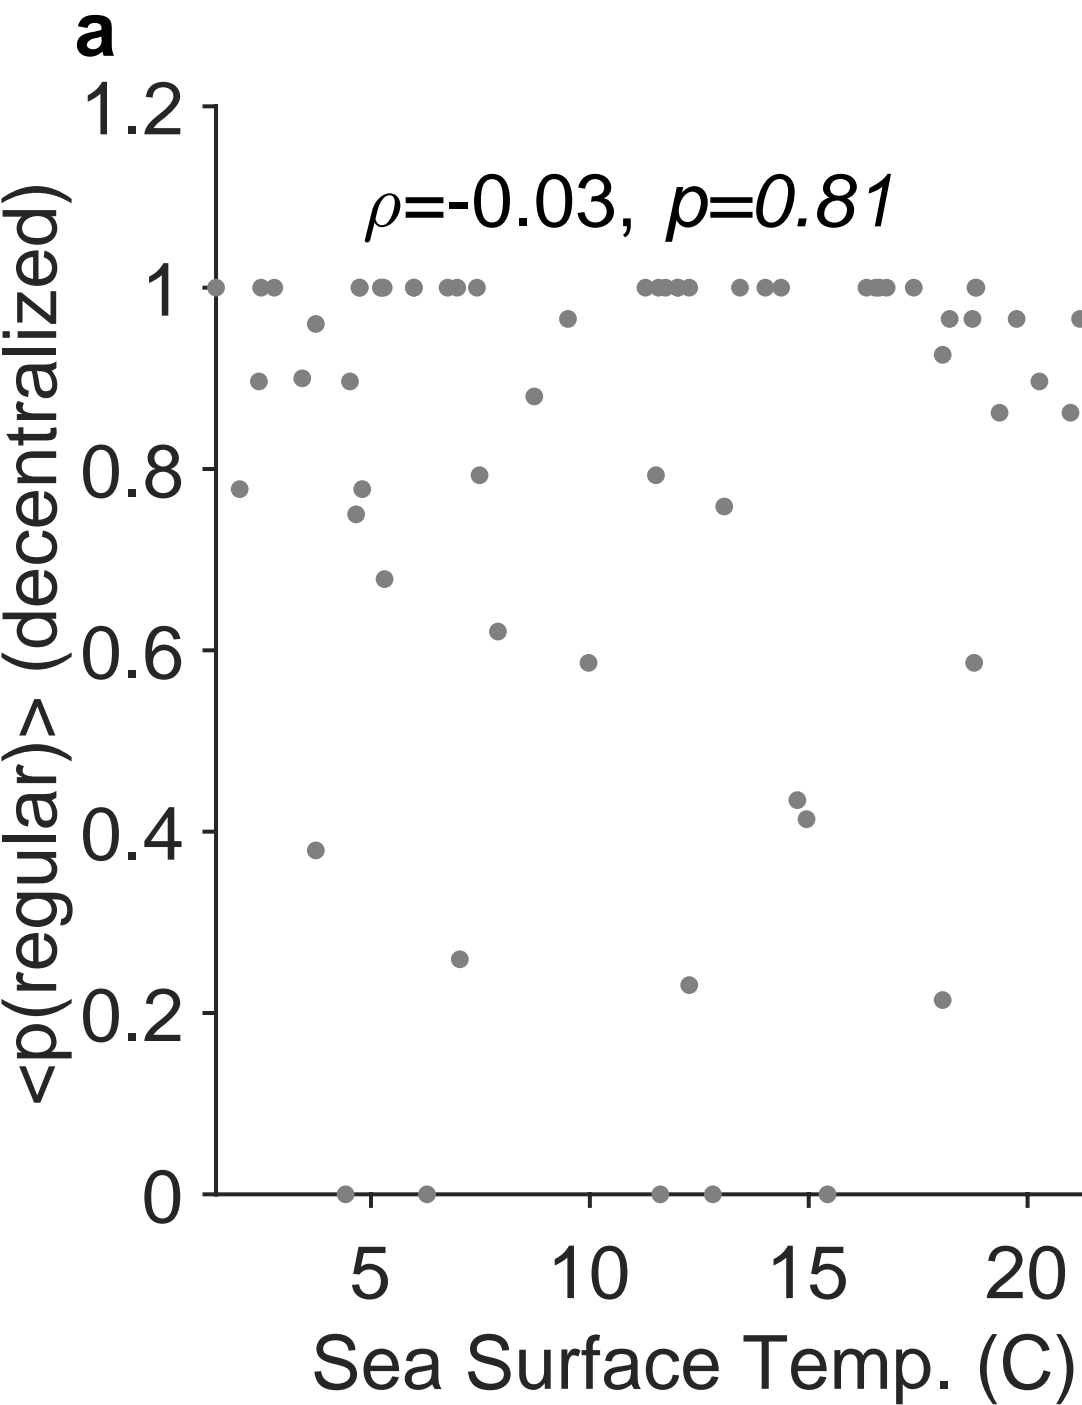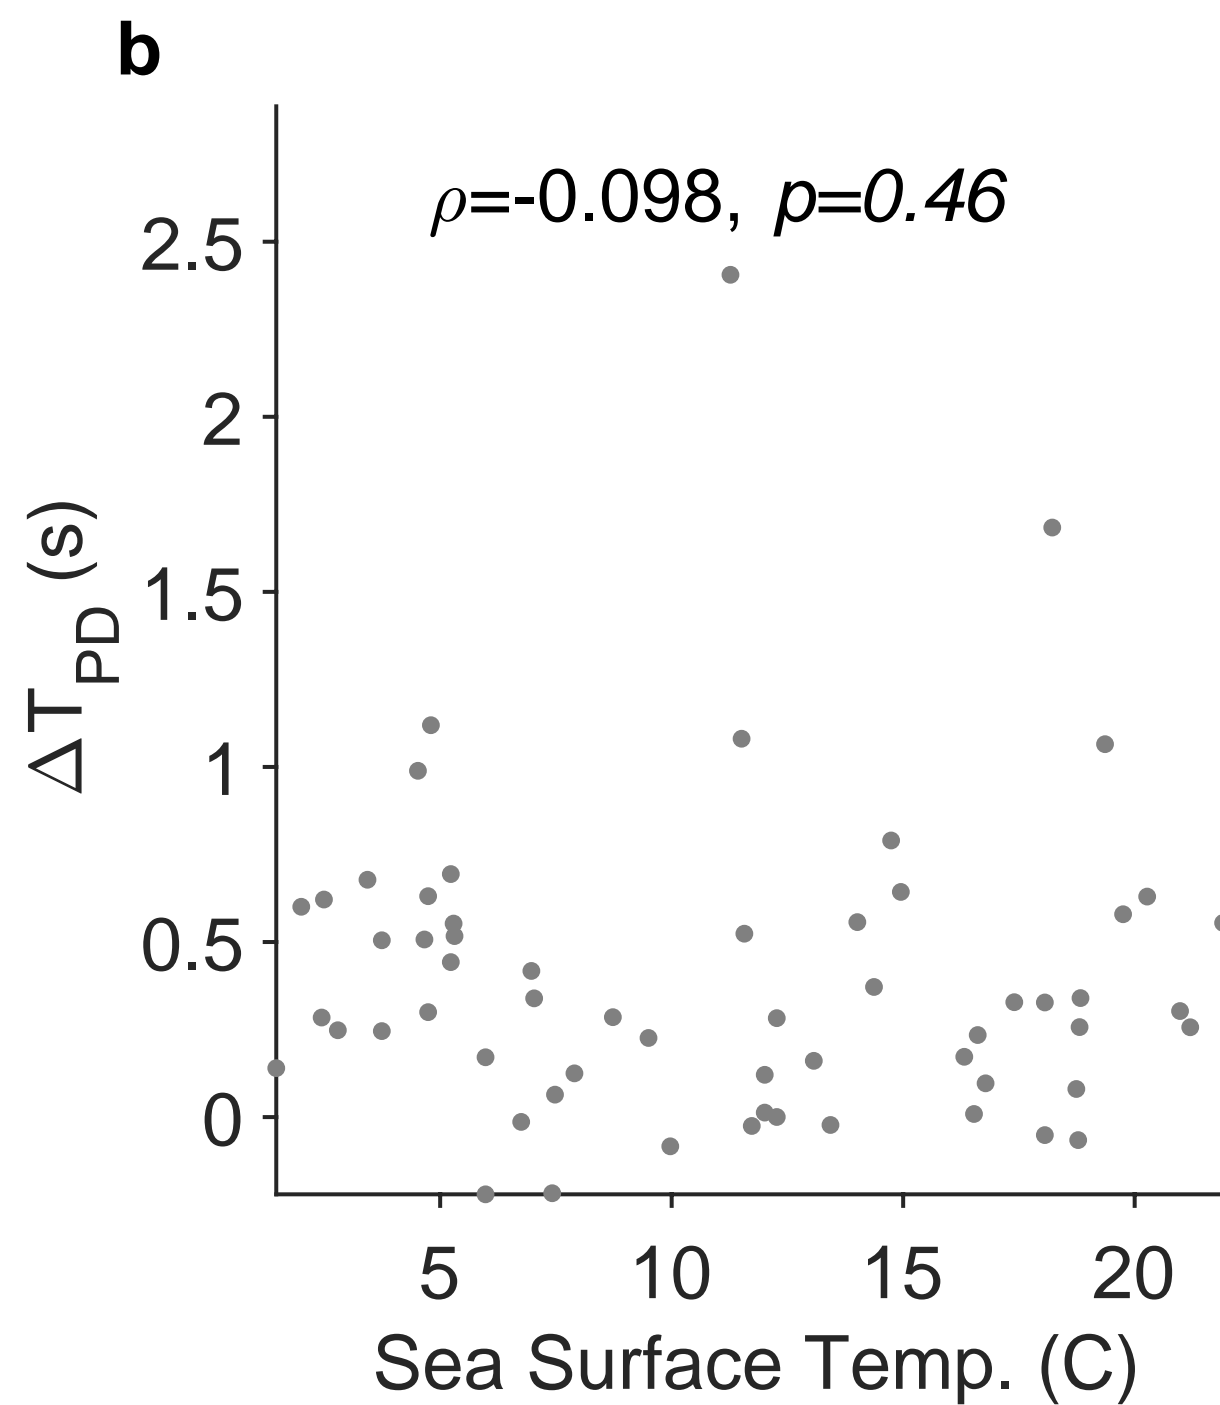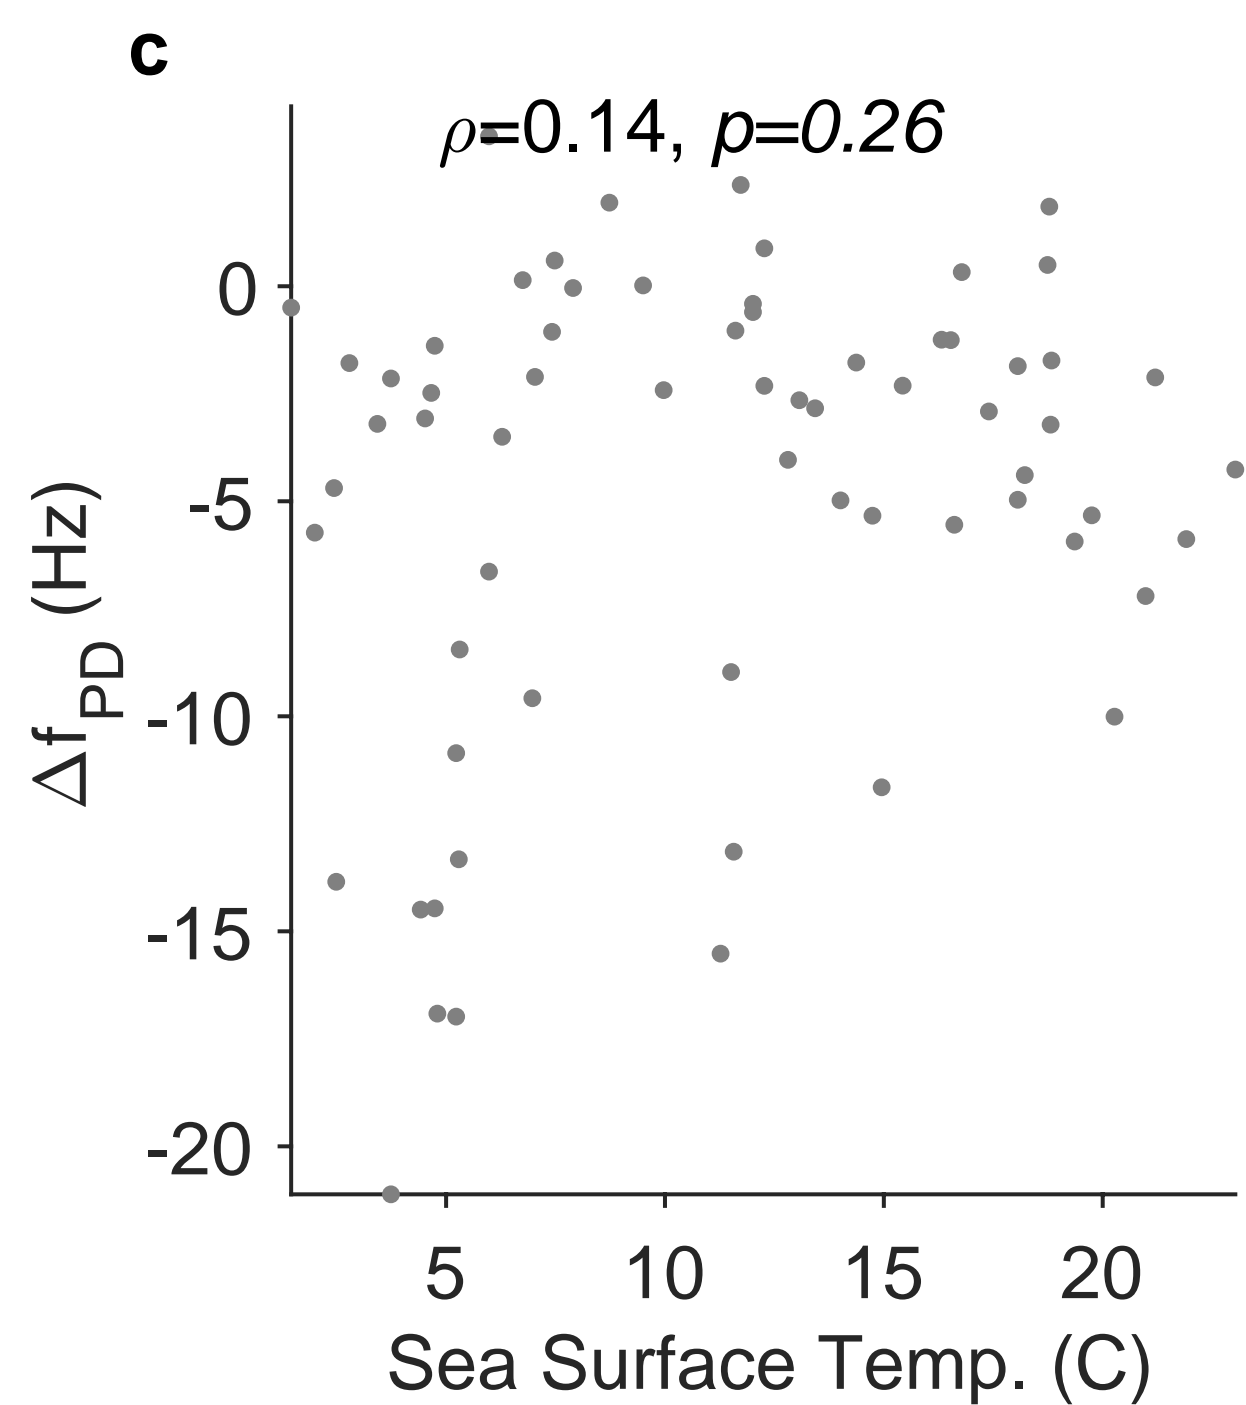

Supplement: supp [file elife-76579-supp-v1.zip]

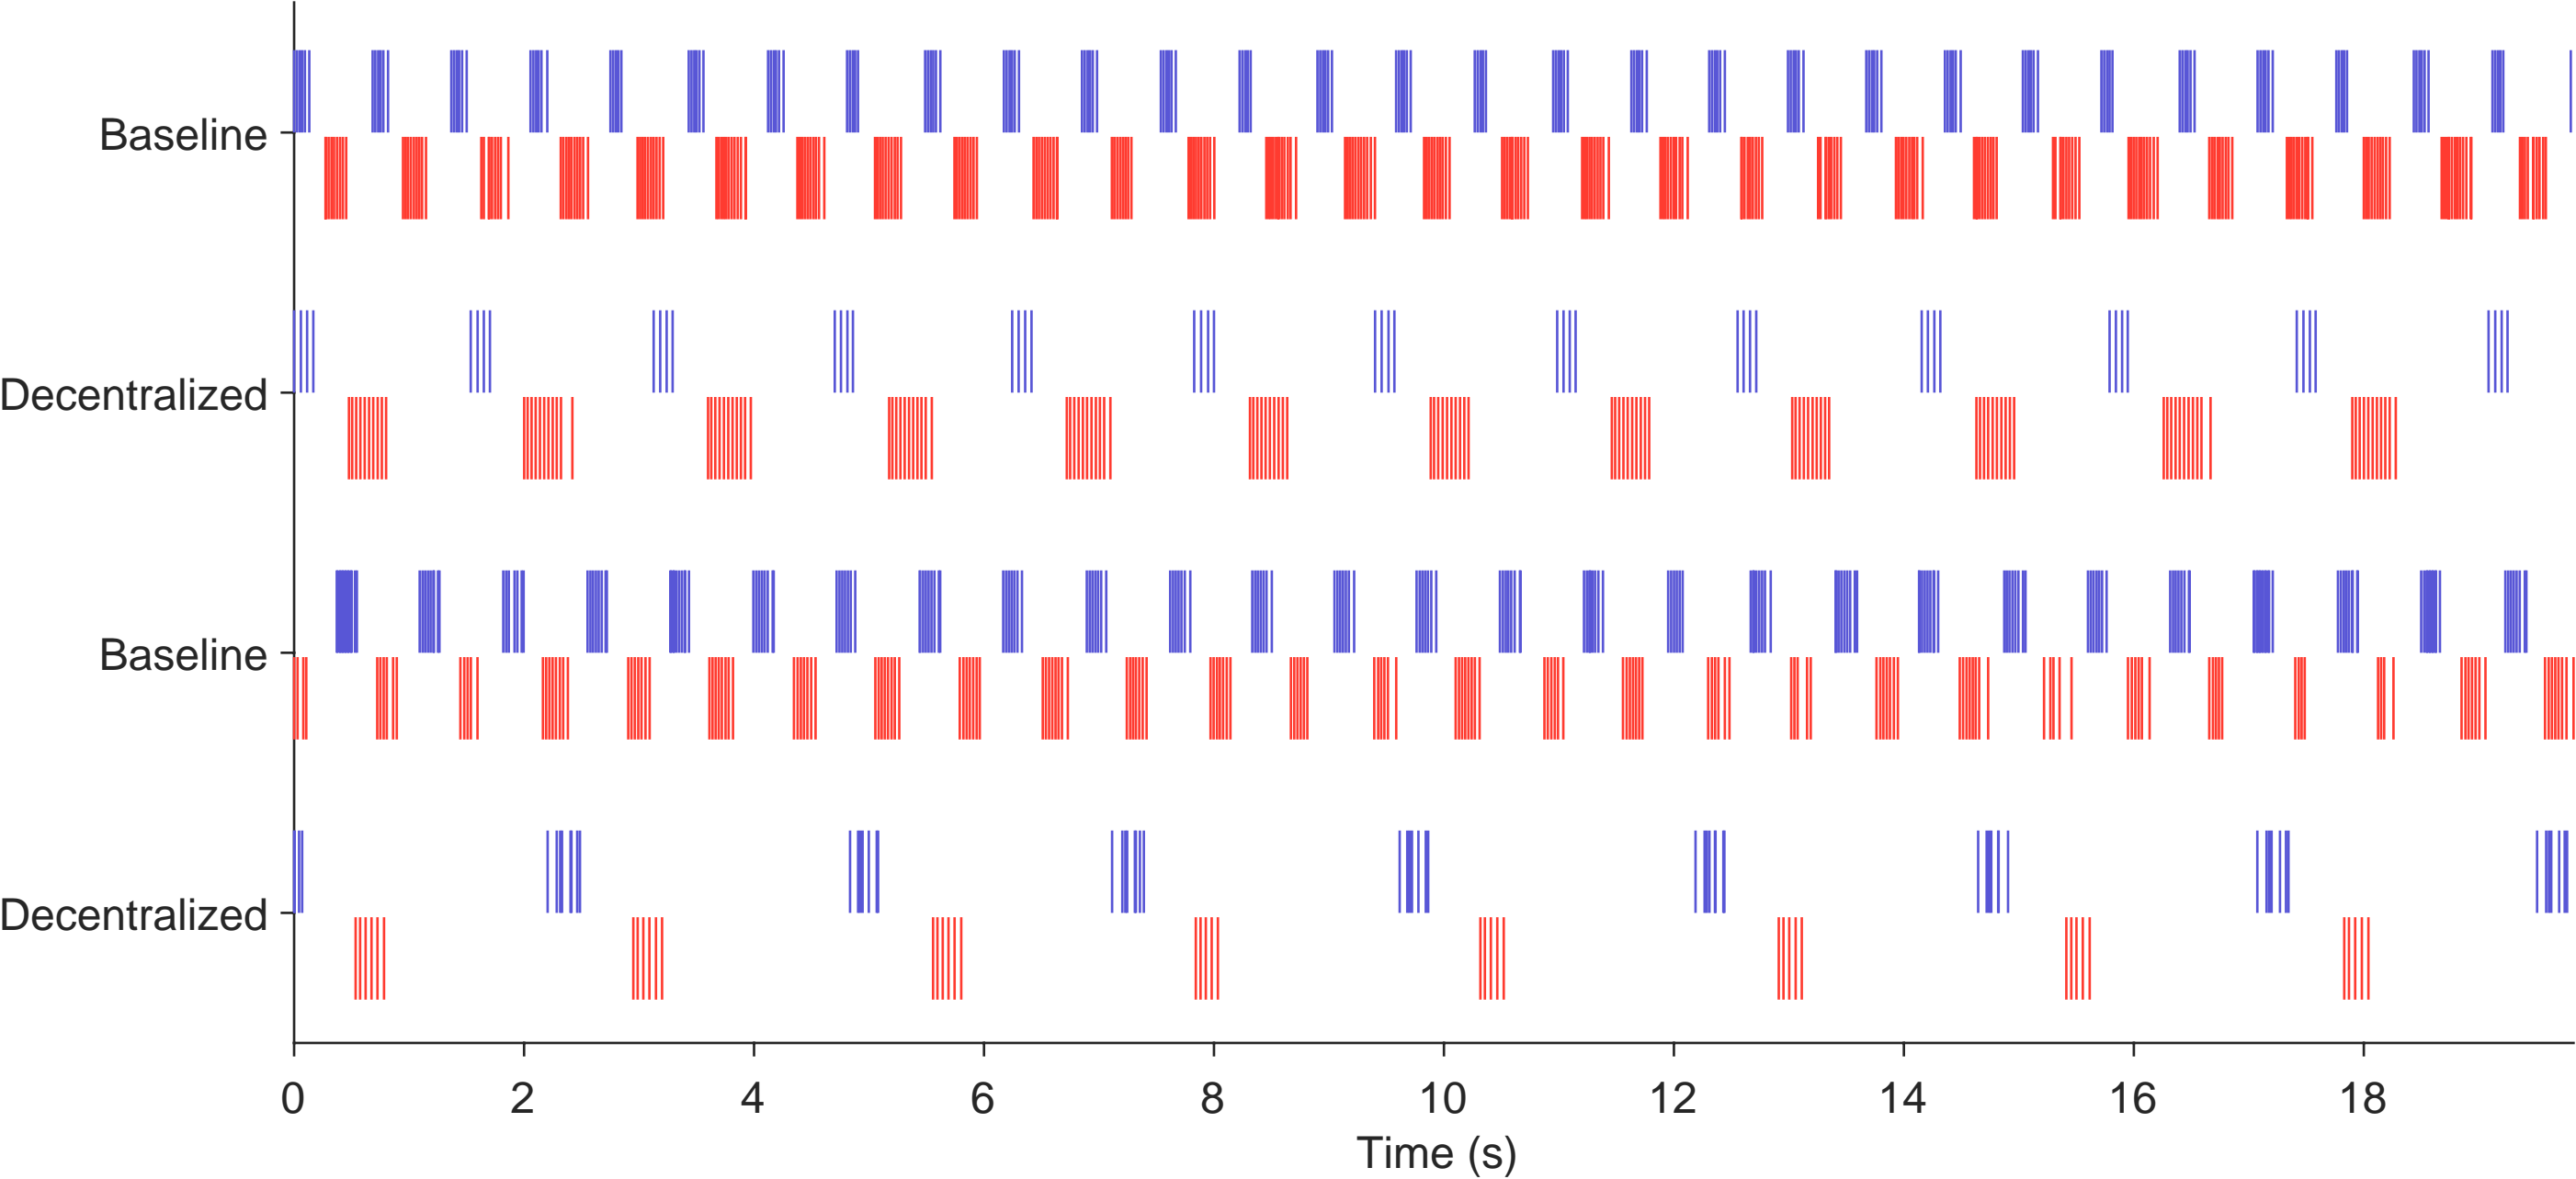

Supplement: supp [file elife-76579-supp-v1.zip]
